# Supplementary material for: phylotaR: An automated pipeline for retrieving orthologous DNA sequences from GenBank in R
Source: Preprints.org preprint supplement (doi:10.20944/preprints201804.0047.v1), 2018-04-04
Supplement: Supplementary file 1 [file supplementary]

No. clusters 30 60 90 120

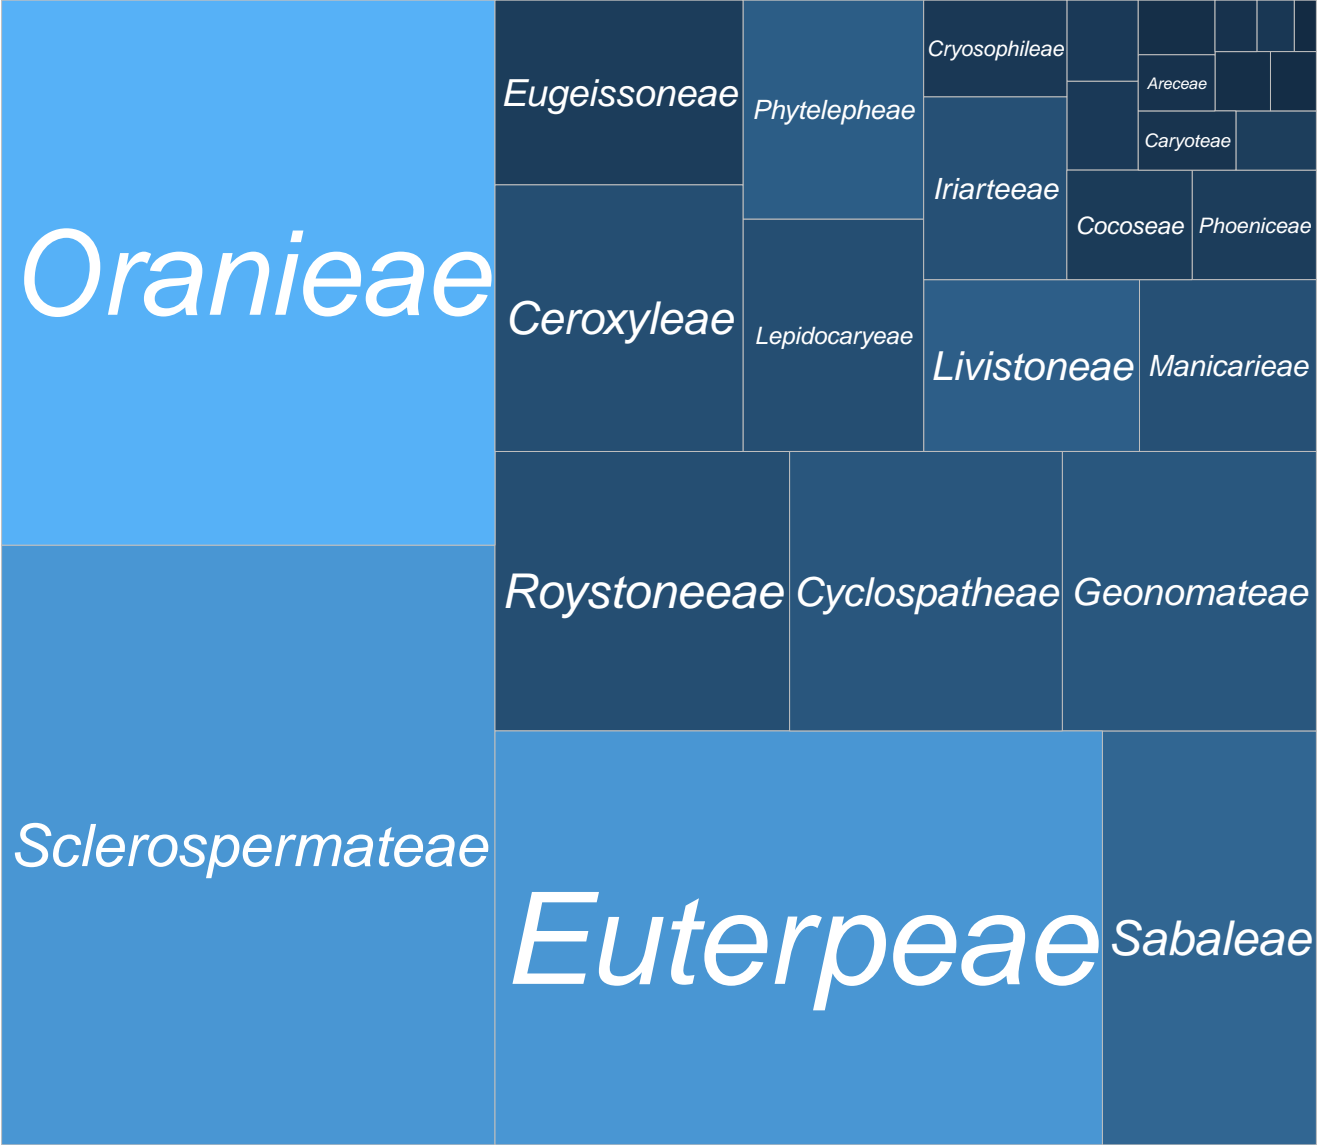

a.

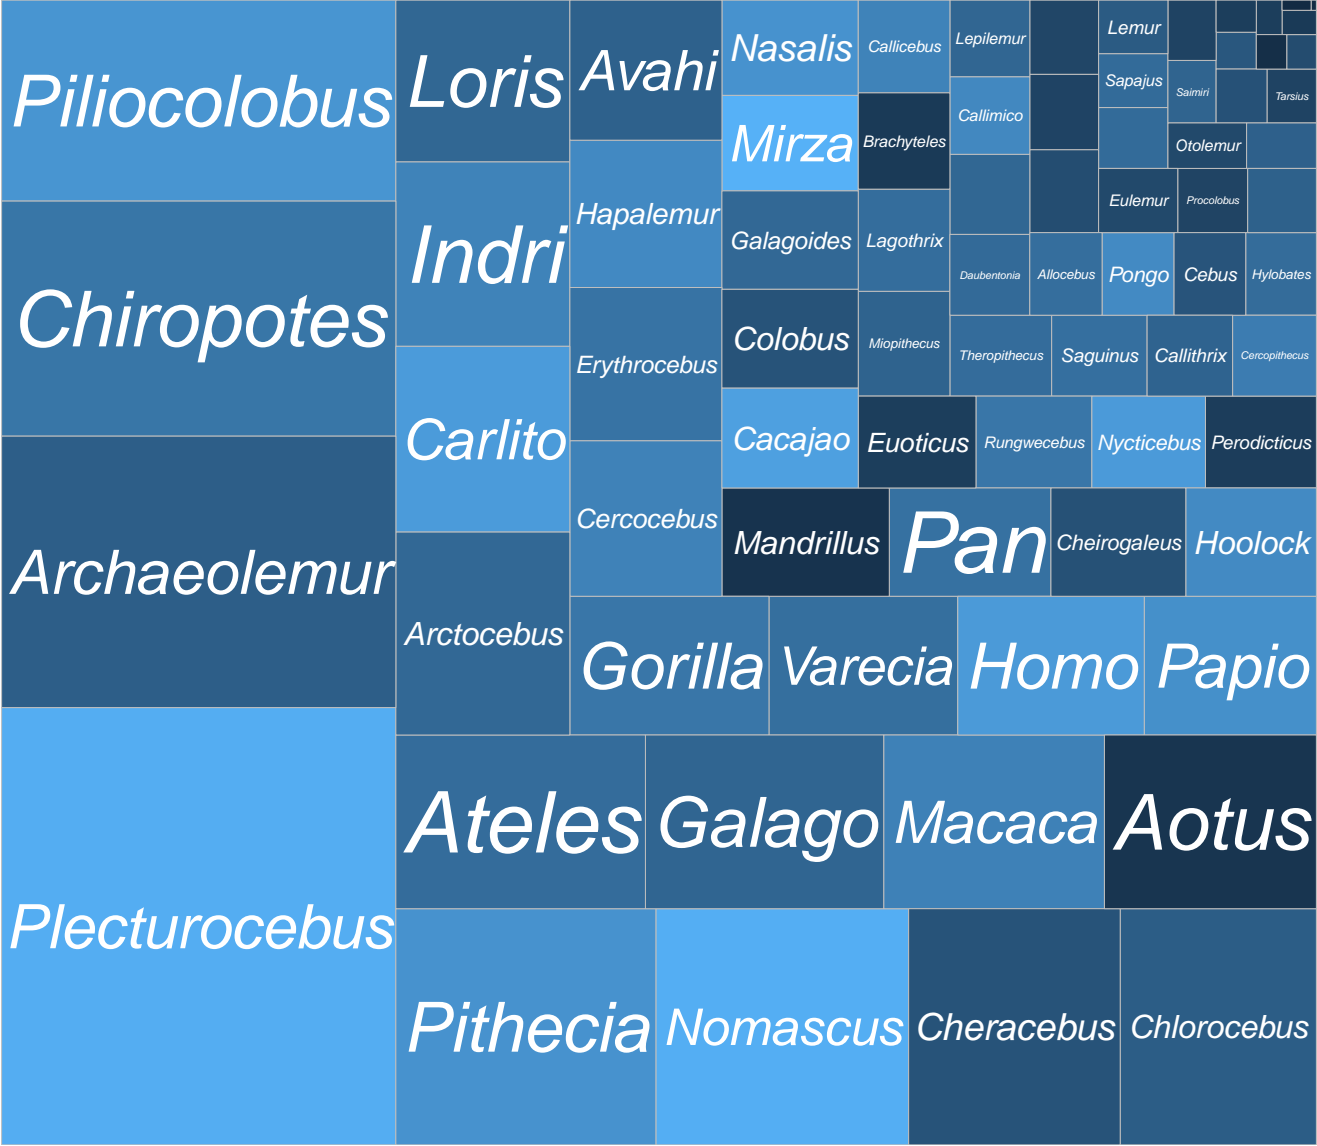

b.

Figure S2. Relative distribution of number of sequences (box size) and clusters (colour) across tribes/genera for palms (a) and primates (b).
