# Supplementary material for: phylotaR: An automated pipeline for retrieving orthologous DNA sequences from GenBank in R
Source: Preprints.org preprint supplement (doi:10.20944/preprints201804.0047.v1), 2018-04-04
Supplement: Supplementary file 1 [file table_s1.xlsx]

## Sheet: Sheet1
Name	Default	Description
mxnds	100000	The maximum number of nodes descending from a taxonomic group. Larger clades will be broken down into subclades and analysed separately.
mdlthrs	3000	The 'model organism threshold'. Taxa with more sequences than this number will be considered model organisms and only a random mdlthrs subset of their sequences will be downloaded, rather than all sequences as for non-model organisms.
mnsql	250	The minimum length of sequence in nucleotide base pairs to download. Shorter sequences are ignored.
mxsql	2000	The maximum length of sequence in nucleotide base pairs to download. Longer sequences are ignored.
mxrtry	100	The maximum number of attempts to make when downloading sequences from the NCBI server.
mxsqs	50000	The maximum number of sequences to BLAST in all-vs-all searches. If there are more sequences for a node, BLAST is performed at lower taxonomic subclades.
mxevl	1e-10	The maximum E-value for a successful BLAST.
mncvrg	51	The minimum percentile coverage defining an overlapping BLAST hit. Sequences with BLAST matches with lower values are not considered orthologous.
ncps	1	The number of CPUs to run clustering in parallel. If 1, no parallelisation performed.
