# Supplementary material for: phylotaR: An automated pipeline for retrieving orthologous DNA sequences from GenBank in R
Source: Preprints.org preprint supplement (doi:10.20944/preprints201804.0047.v1), 2018-04-04
Supplement: Supplementary file 2 [file supplementary]

No. taxa 200 400 600

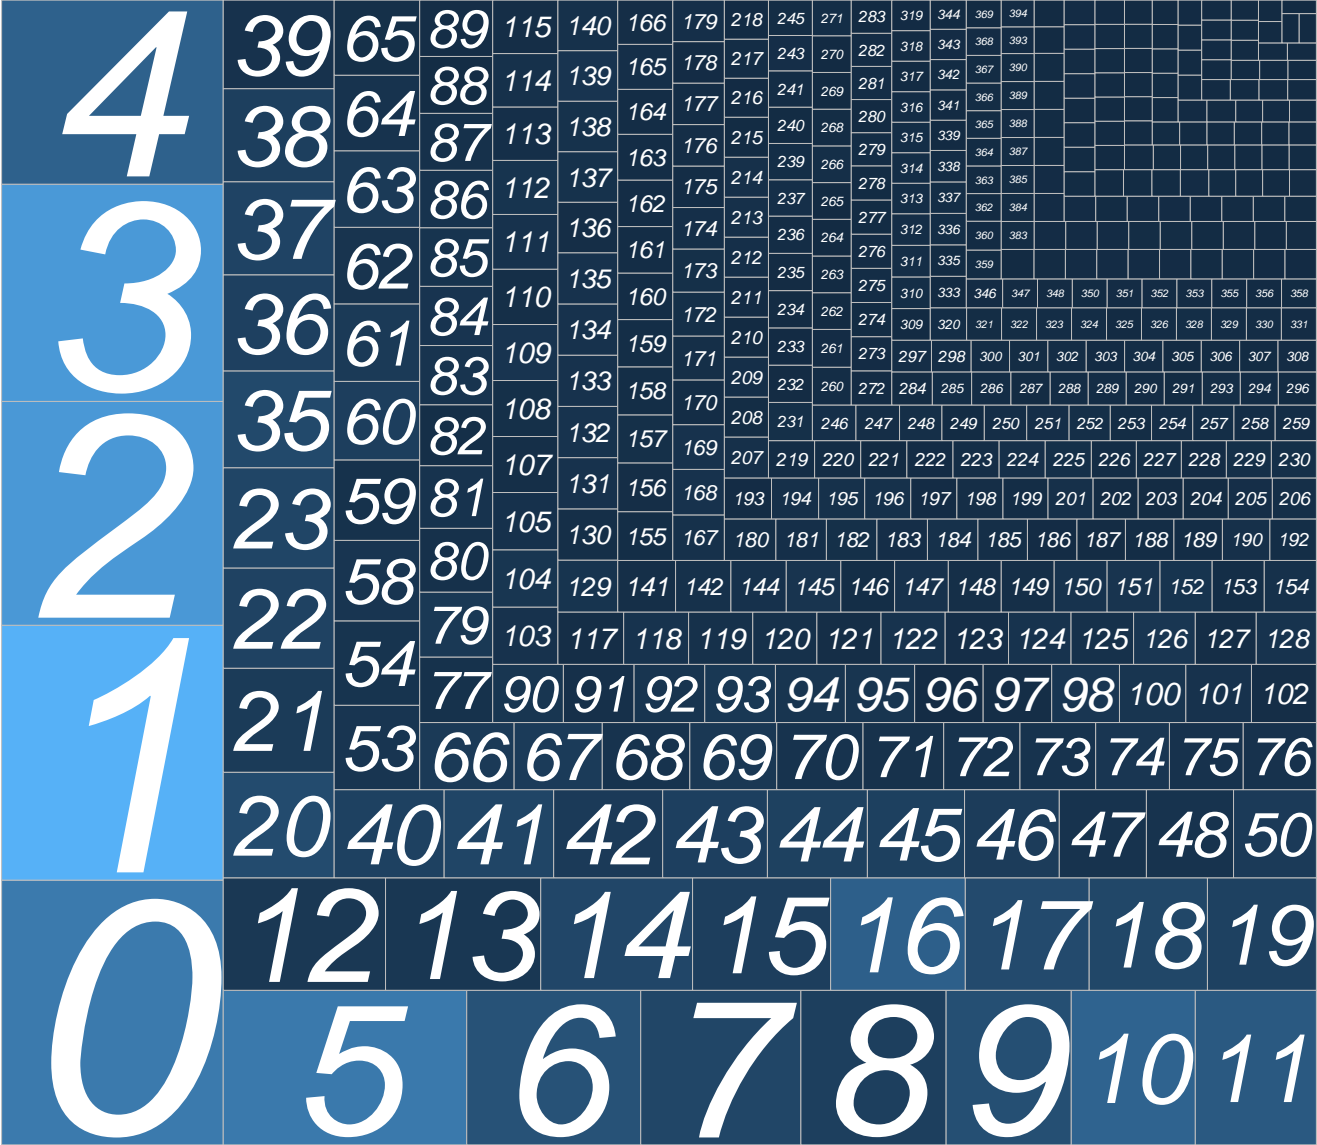

a.

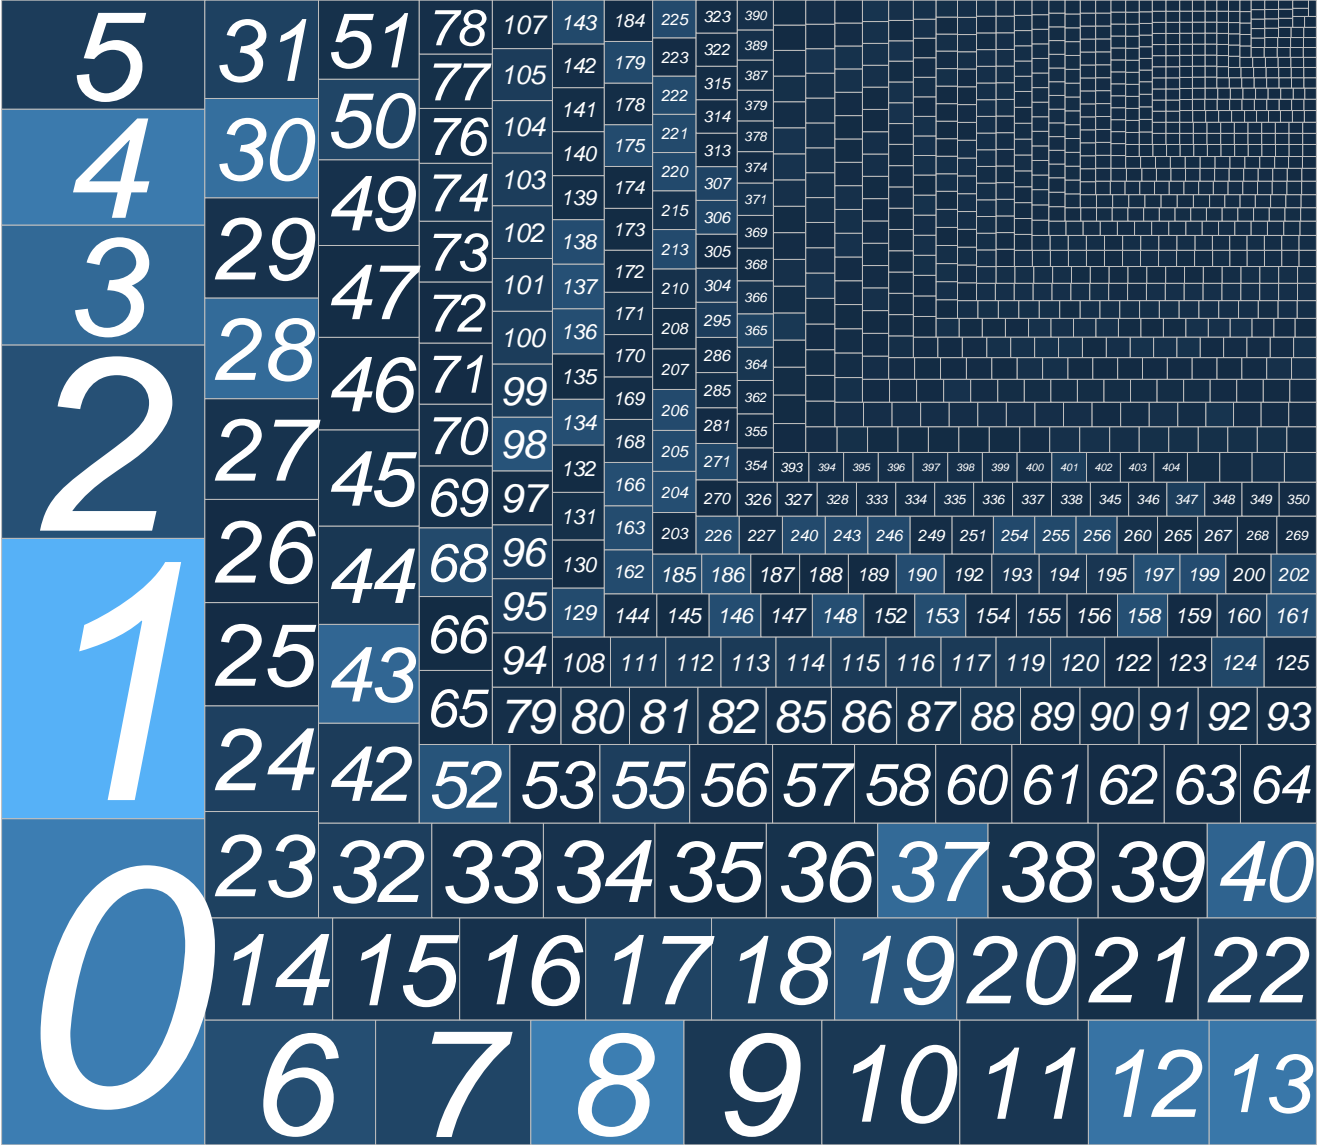

b.

Figure S3. Relative distribution of number of sequences (box size) and taxa (colour) across clusters for palms (a) and primates (b).
