# Supplementary material for: phylotaR: An automated pipeline for retrieving orthologous DNA sequences from GenBank in R
Source: Preprints.org preprint supplement (doi:10.20944/preprints201804.0047.v1), 2018-04-04
Supplement: Supplementary file 2 [file table_s2_a.xlsx]

## Sheet: best_clusters_palms
Table S1. (a.) Top ten clusters by number of genera for palms. ID - unique identifier within a phylotaR run, Type - cluster type, Seed Sequence - ID of most connected sequence in a clsuter, Parent TaxID - ID of MRCA of all sequence source organisms, No. Tribes - number of tribes, Md. Seq. Length - median sequence length of all sequences in a clusters, ‘MAD’ - maximum alignment density score, Defi…
ID	Type	Seed Sequence	Parent TaxID	No. Tribes	No. Seq.	Md. Seq. Length	MAD	Definition Words	Feature Words
0	merged	AF206748.1	4710	28	54	1419	0.85479	gene (0.1), chloroplast (0.09)	rbcl (0.2), large (0.2)
2	merged	KY020641.1/10..1563	4710	28	52	1619	0.888948	partial (0.1), gene (0.07)	matk (0.9), barcode (0.04)
4	merged	AM497779.1/539..936	4710	28	56	515	0.851933	chloroplast (0.1), for (0.08)	trnl (0.8), trnaleu (0.2)
16	merged	AM116779.1	4710	28	52	847	0.85368	gene (0.1), rps16 (0.1)	rps16 (0.4), gene (0.1)
1	merged	AJ830099.1	4710	27	51	784	0.830896	gene (0.1), rpb2 (0.1)	rpb2 (0.2), gene (0.1)
10	merged	DQ273082.1	4710	27	43	921	0.96682	dehydrogenase (0.08), gene (0.08)	ndhf (1)
3	merged	AF453356.1	4710	25	47	621	0.772247	gene (0.09), partial (0.09)	prk (1)
35	merged	AY044581.1/1..1033	4710	24	35	1087	0.923636	trnqrps16 (0.09), intergenic (0.08)	intergenic (0.3), spacer (0.3)
93	merged	AF209652.1	4710	24	38	1497	0.994621	gene (0.1), chloroplast (0.1)	atpb (0.9), atp (0.03)
139	merged	AH001752.2	4710	24	37	1735	0.970421	18s (0.1), sequence (0.1)	18s (0.3), ribosomal (0.3)
