# Supplementary material for: phylotaR: An automated pipeline for retrieving orthologous DNA sequences from GenBank in R
Source: Preprints.org preprint supplement (doi:10.20944/preprints201804.0047.v1), 2018-04-04
Supplement: Supplementary file 3 [file table_s2_b.xlsx]

## Sheet: best_clusters_primates
Table S2. (b.) Top ten clusters by number of genera for primates. ID - unique identifier within a phylotaR run, Type - cluster type, Seed Sequence - ID of most connected sequence in a clsuter, Parent TaxID - ID of MRCA of all sequence source organisms, No. Genera - number of genera, No. Seq. - number of sequences in a cluster, Md. Seq. Length - median sequence length of all sequences in a cluster…
ID	Type	Seed Sequence	Parent TaxID	No. Genera	No. Seq.	Md. Seq. Length	MAD	Definition Words	Feature Words
1	merged	JQ256955.1/14165..15305	9443	75	150	1140	0.960636	complete (0.1), mitochondrial (0.08)	cytb (0.7), cytochrome (0.04)
8	merged	JQ256932.1/73..1022	9443	70	139	953	0.956871	genome (0.1), complete (0.1)	12s (0.3), ribosomal (0.3)
4	merged	KJ434956.1/7008..7691	9443	69	138	684	0.949537	complete (0.1), genome (0.08)	cox2 (0.8), coii (0.1)
13	merged	KY250062.1/1092..2650	9443	68	134	1564	0.972025	genome (0.1), complete (0.1)	16s (0.3), ribosomal (0.3)
12	merged	JQ256946.1/5324..6892	9443	67	133	1545	0.971901	genome (0.1), complete (0.1)	cox1 (0.9), coi (0.04)
30	merged	KP090062.1/11787..13592	9443	67	134	1812	0.981403	complete (0.1), genome (0.1)	nd5 (0.9), nadh5 (0.1)
28	merged	JQ256946.1/7952..8632	9443	66	131	681	0.810303	genome (0.1), complete (0.1)	atp6 (0.7), atpase6 (0.05)
37	merged	JQ256933.1/2725..3681	9443	66	132	957	0.932468	genome (0.2), complete (0.1)	nd1 (0.8), nadh1 (0.1)
40	merged	JQ256979.1/3892..4933	9443	66	131	1043	0.992759	genome (0.2), complete (0.1)	nd2 (0.9), nadh2 (0.1)
43	merged	JQ256926.1/8630..9413	9443	66	132	784	0.950753	genome (0.2), mitochondrion (0.1)	cox3 (0.8), coiii (0.06)
